# Supplementary material for: Revealing the Arabidopsis AtGRP7 mRNA binding proteome by specific enhanced RNA interactome capture
Source: PubMed Central journal article supplement (PMC11177498; doi:10.1186/s12870-024-05249-4), 2024-06-14
Supplement: 12870_2024_5249_MOESM2_ESM.pdf [file 12870_2024_5249_MOESM2_ESM.pdf]

## ADDITIONAL FILE 2

Figure S1: Uncropped blots to Fig. 1D

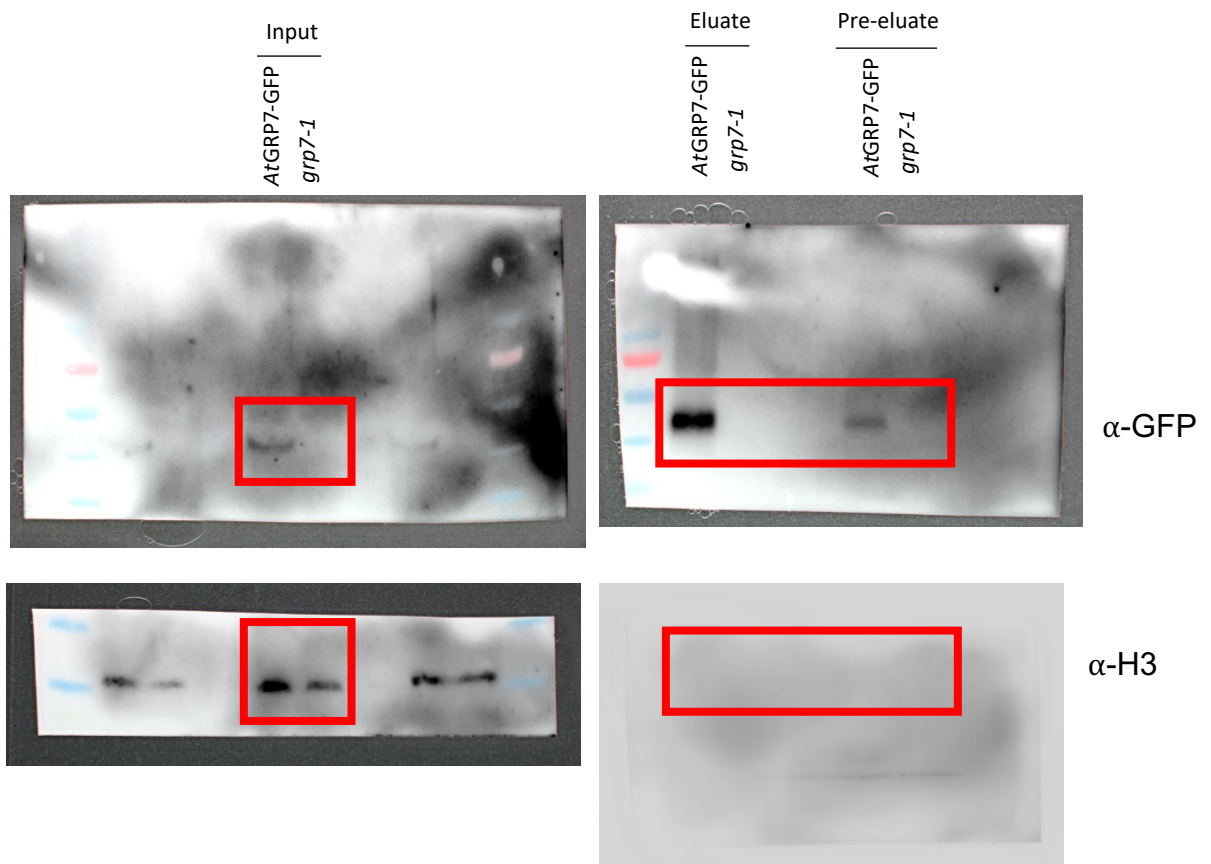

Immunoblot analysis of *AtGRP7::AtGRP7-GFP grp7-1* and *grp7-1* control plants subjected to RNP capture with 5'UTR\_1 LNA oligonucleotides.

# Figure S2: Uncropped gels to Additional file 3C and 3D

3C

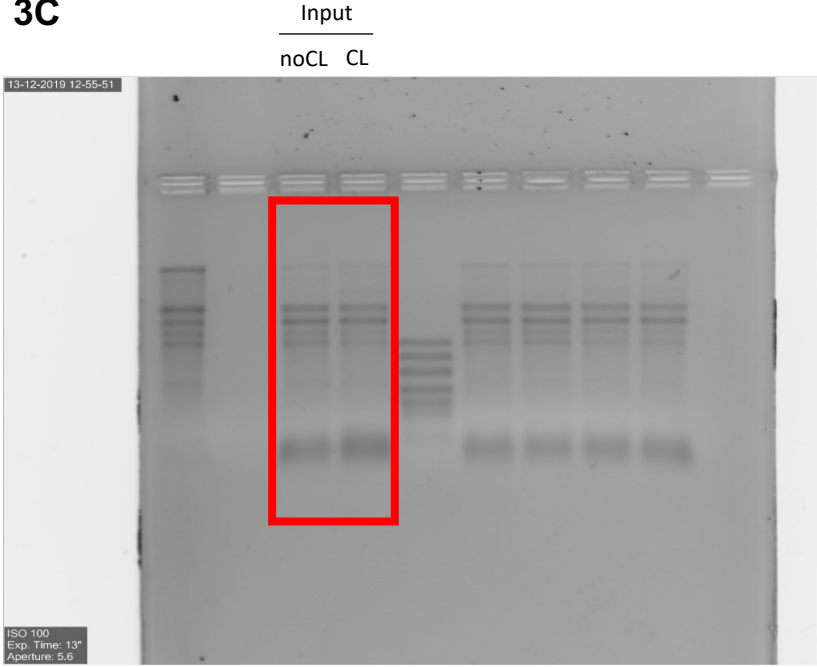

3D

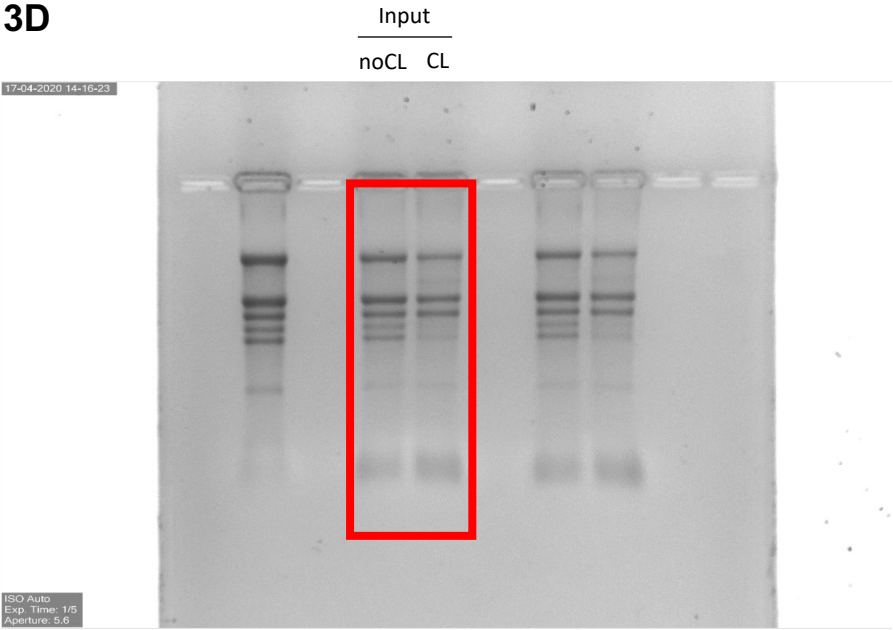

Agarose-formaldehyde gel electrophoresis of total RNA in the input of crosslinked and non-crosslinked samples after tandem capture with the LNA 5'UTR\_1 probe followed by oligo(dT) capture using the protocol of Rogell *et al.*, 2017 (3C) or Chu *et al.*, 2015 (3D).

## Figure S3: Uncropped gel to Additional file 4B

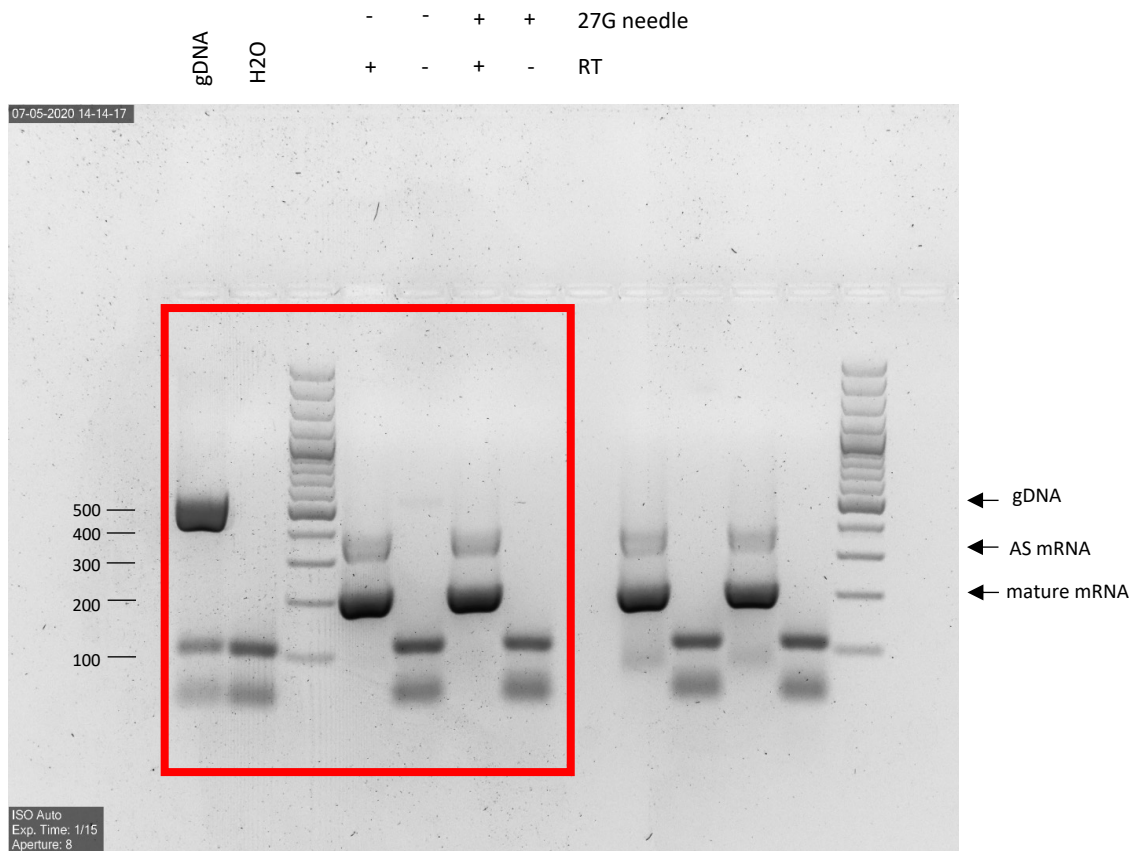

Comparison of the level of genomic *AtGRP7* DNA in the cell lysate without passage (-27G needle) or after passage through a 27G needle (+27G needle). RT-PCR was performed with (+RT) or without (-RT) prior reverse transcription. For comparison, amplification from genomic DNA (gDNA) is shown. Arrows indicate the amplicons derived from gDNA, alternatively spliced pre-mRNA and the fully spliced mRNA.

## Figure S4: Uncropped gels to Fig. 3A and Fig. 3B

**3A**

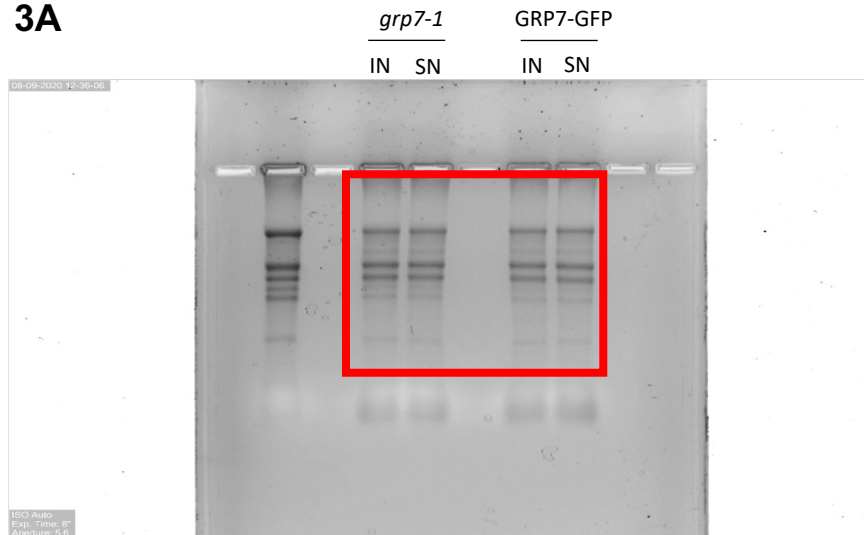

Agarose-formaldehyde gel electrophoresis of total RNA in the lysate (input) and the supernatant after probe hybridization (SN) in *AtGRP7-GFP grp7-1* plants and *grp7-1* control plants.

**3B**

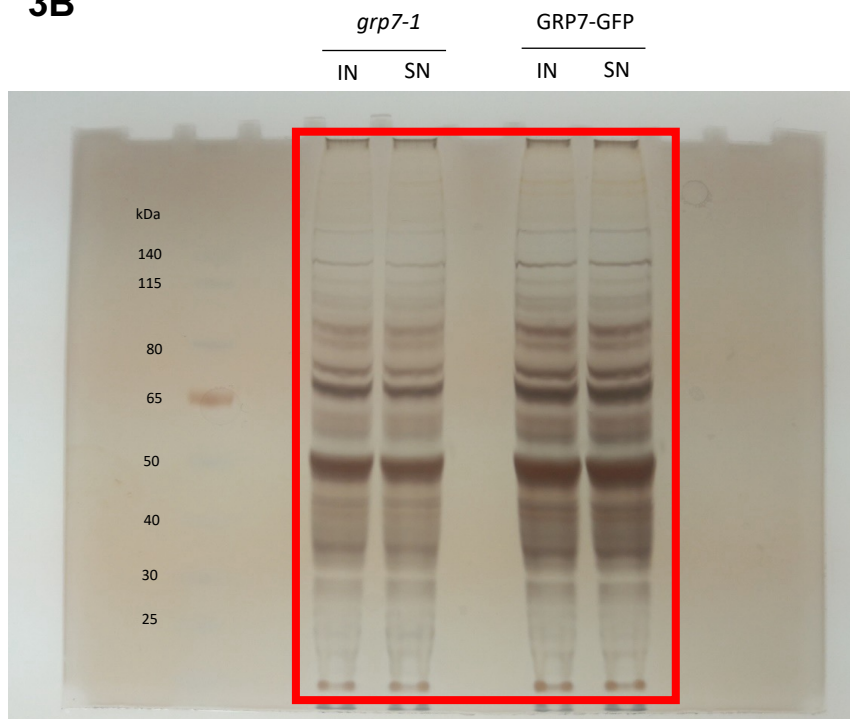

Silver staining of total protein in the lysate (input) and the supernatant after probe hybridization (SN) in the *AtGRP7-GFP grp7-1* plants and *grp7-1* control plants.

## Figure S5: Uncropped gels to Additional file 6A and 6B

6A

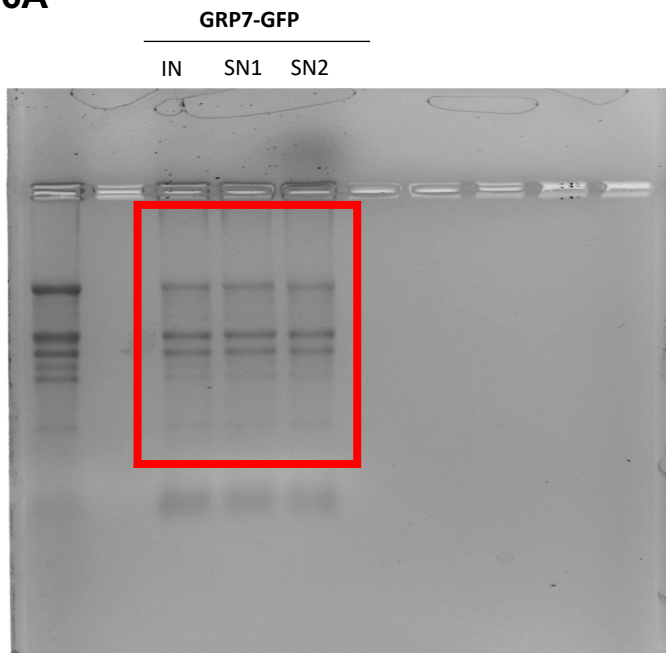

Agarose-formaldehyde gel electrophoresis of total RNA in the lysate (input) and the supernatant after the first round (SN1) and second round (SN2) of probe hybridization in the *AtGRP7-GFP grp7-1* plants.

6B

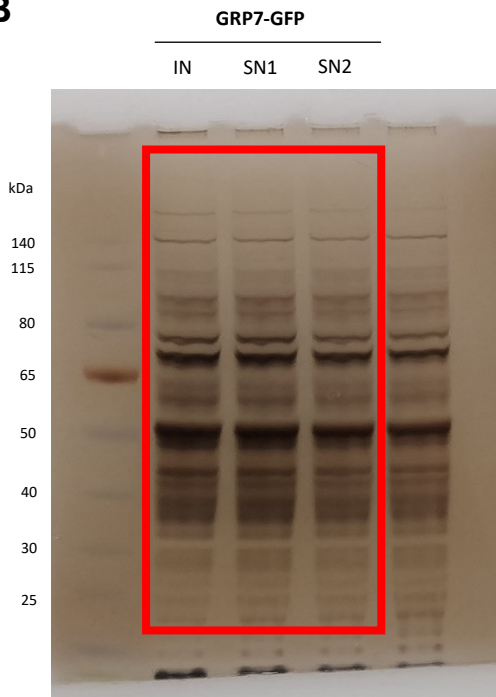

Silver staining of total protein in the lysate (input) and the supernatant after the first round (SN1) and second round (SN2) of probe hybridization in the *AtGRP7-GFP grp7-1* plants.

## Figure S6: Uncropped gels to Fig. 6A, 6B, 6C and 6D

**6A**

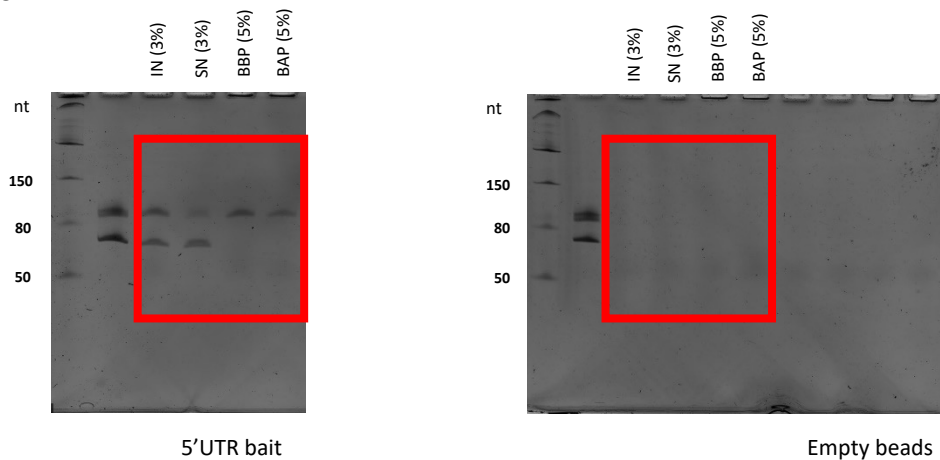

**6B**

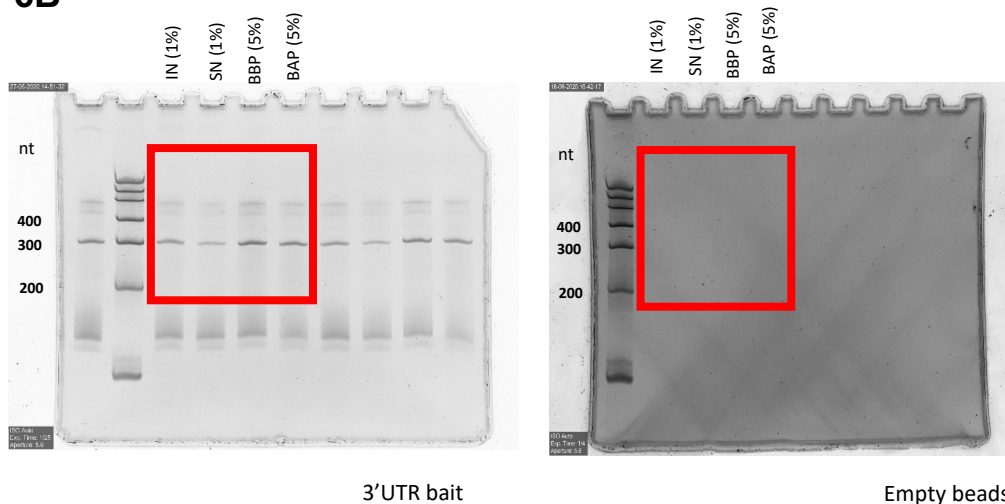

Coupling efficiency of biotinylated 5'UTR bait (**6A**) and 3'UTR bait (**6B**) to magnetic streptavidin beads. Aliquots of the RNA isolated from the input (IN), supernatant after coupling (SN) and eluates from the beads before (BBP) and after pull-down (BAP) were analyzed on 12.5% urea PAGE gels. Empty beads were used as controls.

### 6C

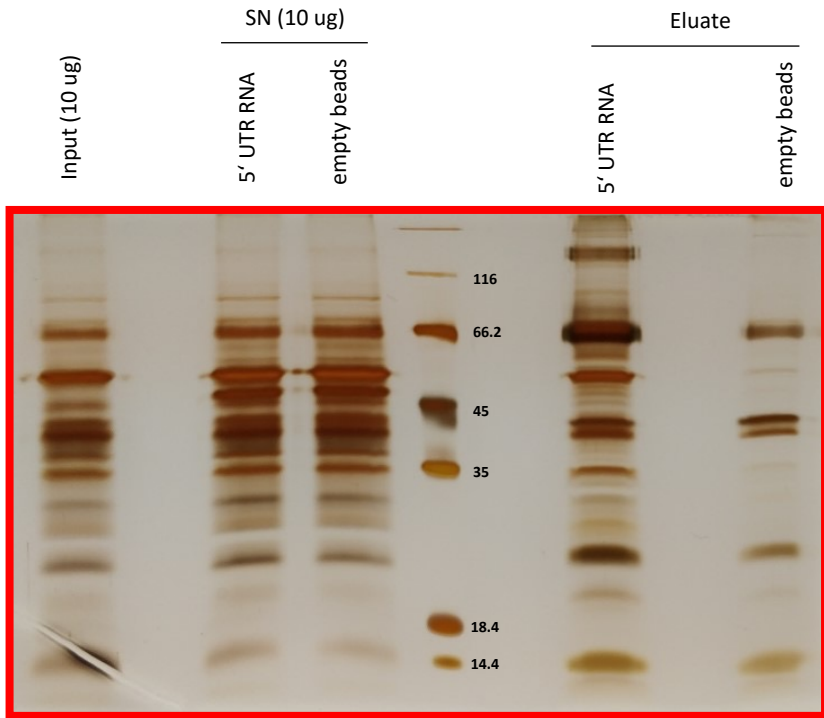

### 6D

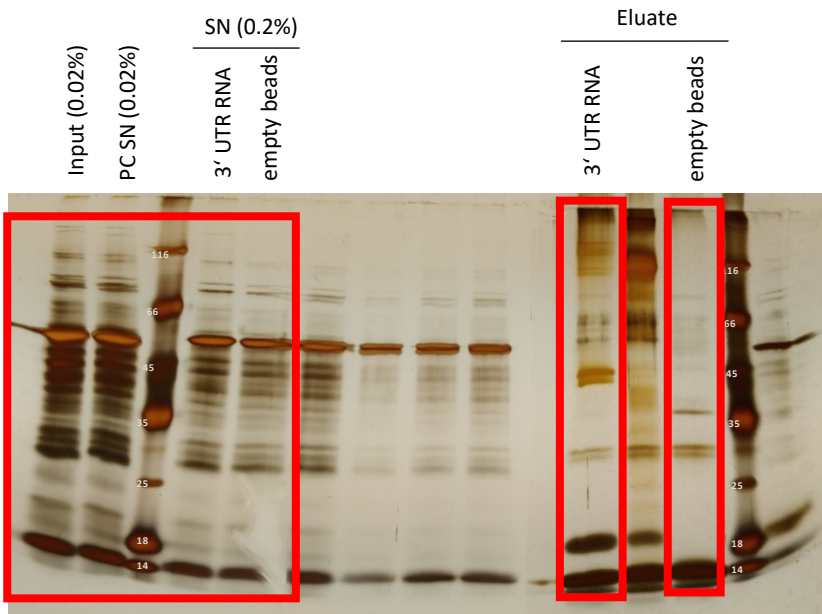

Silver staining of proteins recovered after *in vitro* captures with 5'UTR bait (6C) and 3'UTR bait (6D). Aliquots of the input, supernatant and eluates of the respective coupled and empty beads were separated on a 12% SDS-Page and subjected to silver staining.

**Figure S7: Uncropped gel to Additional file12**

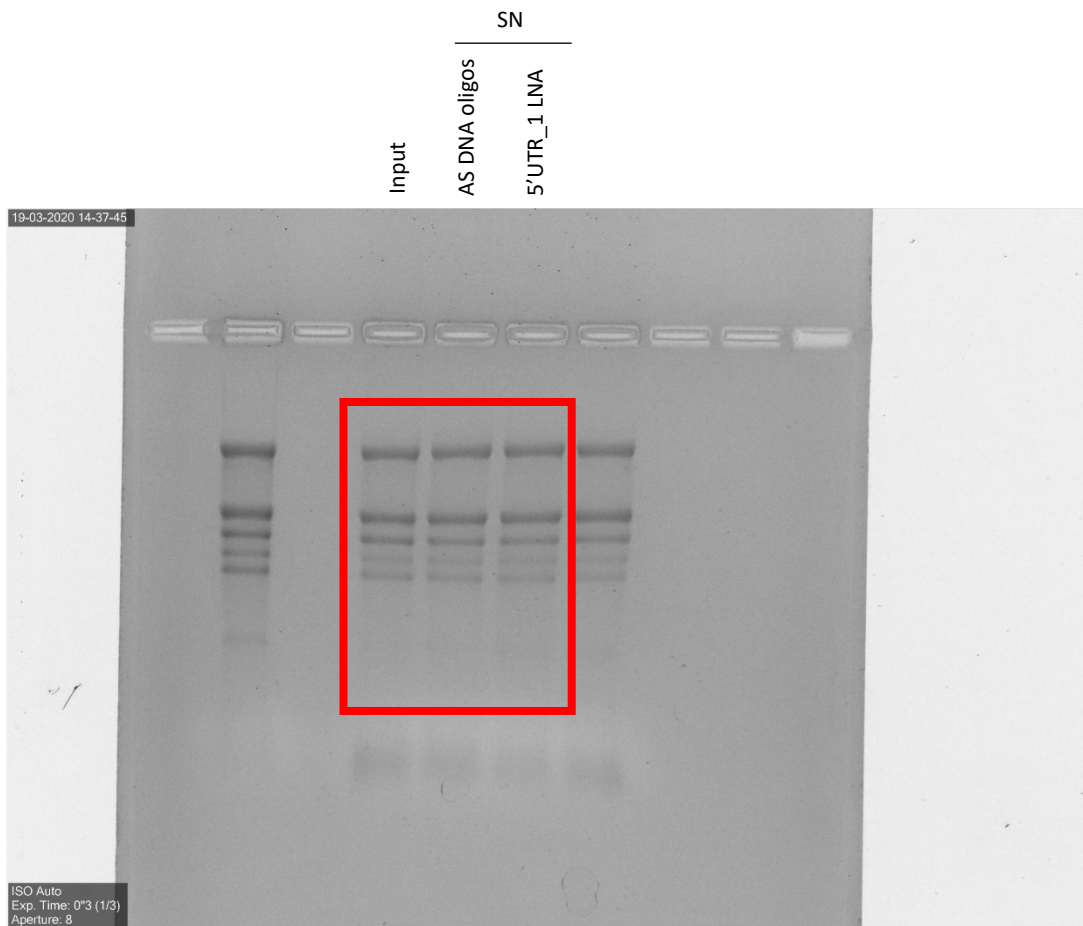

Agarose-formaldehyde gel electrophoresis of total RNA in the lysate (input) and the supernatant (SN) after hybridization with AS DNA oligonucleotides or the 5'UTR\_1 LNA oligo in *AtGRP7*-GFP *grp7-1* plants.
