# Supplementary material for: Revealing the Arabidopsis AtGRP7 mRNA binding proteome by specific enhanced RNA interactome capture
Source: PubMed Central journal article supplement (PMC11177498; doi:10.1186/s12870-024-05249-4), 2024-06-14
Supplement: 12870_2024_5249_MOESM3_ESM.pdf [file 12870_2024_5249_MOESM3_ESM.pdf]

## Additional file 3

### (A) Protocol based on Rogell *et al.* (2017)

| Step               | Buffer composition                                                                                                                                                                                                                                                                                         | Procedure                                                                                                                             |
|--------------------|------------------------------------------------------------------------------------------------------------------------------------------------------------------------------------------------------------------------------------------------------------------------------------------------------------|---------------------------------------------------------------------------------------------------------------------------------------|
| <b>Lysis</b>       | 20 mM Tris-HCl pH7.5, 500 mM LiCl, 0.5% LiDS, 4mM MgCl <sub>2</sub> , 0.02% NP40<br>Fresh: 5mM DTT, 2.5% PVP40<br>1% β-ME, 1x Complete<br>Protease Inhibitor, 10 mM RVC, 15% formamide (added before hybridization)                                                                                        | 40 nmol 5'UTR LNA probe was added to 50 ml lysate prepared from 8 g ground plant tissue; probe hybridization at 4°C for 2h on rotator |
| <b>Washes</b>      | <b>Buffer I:</b> 20 mM Tris-HCl pH7.5, 500 mM LiCl, 0.1% LiDS, 4mM MgCl <sub>2</sub> , 0.02% NP40, 5 mM DTT<br><b>Buffer II:</b> 20 mM Tris-HCl pH7.5, 500 mM LiCl, 4mM MgCl <sub>2</sub> , 0.02% NP40, 5 mM DTT<br><b>Buffer III:</b> 20 mM Tris-HCl pH7.5, 200 mM LiCl, 4mM MgCl <sub>2</sub> , 5 mM DTT | 2 washes with each buffer for 5 min at 4°C                                                                                            |
| <b>Pre-elution</b> | H <sub>2</sub> O                                                                                                                                                                                                                                                                                           | 40°C, 5 min, 800 rpm                                                                                                                  |
| <b>Elution</b>     | 10 mM Tris-HCl pH7.5, 1 mM EDTA                                                                                                                                                                                                                                                                            | 90°C, 3 min, 800 rpm                                                                                                                  |

### (B) Protocol based on Chu *et al.* (2015)

| Step               | Buffer composition                                                                                                                                                                | Procedure                                                                                                                             |
|--------------------|-----------------------------------------------------------------------------------------------------------------------------------------------------------------------------------|---------------------------------------------------------------------------------------------------------------------------------------|
| <b>Lysis</b>       | 50 mM Tris-HCl pH 7.5, 500 mM NaCl, 0.5% SDS, 1 mM EDTA<br>Fresh: 5 mM DTT, 2.5% PVP40, 1% beta-ME, 1x Complete<br>Protease Inhibitor, 15% formamide (added before hybridization) | 40 nmol 5'UTR LNA probe was added to 50 ml lysate prepared from 8 g ground plant tissue; probe hybridization at 4°C for 2h on rotator |
| <b>Washes</b>      | <b>Buffer I:</b> 2x SSC pH 7.0, 0.5% SDS, 5 mM DTT<br><b>Buffer II:</b> 1x with 1x SSC pH 7.0                                                                                     | 4 washes with buffer I<br>1 wash with buffer 2 for 5 min at RT                                                                        |
| <b>Pre-elution</b> | 1x SSC pH 7.0                                                                                                                                                                     | 40°C, 5 min, 800 rpm                                                                                                                  |
| <b>Elution</b>     | 10 mM Tris-HCl pH7.5, 1 mM EDTA                                                                                                                                                   | 90°C, 3 min, 800 rpm                                                                                                                  |

### (C)

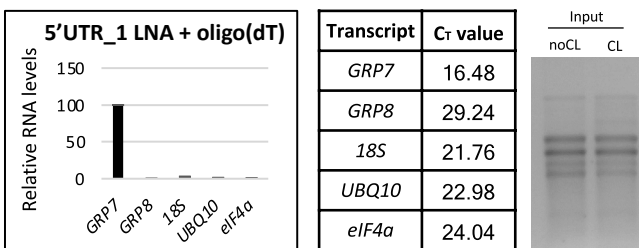

### (D)

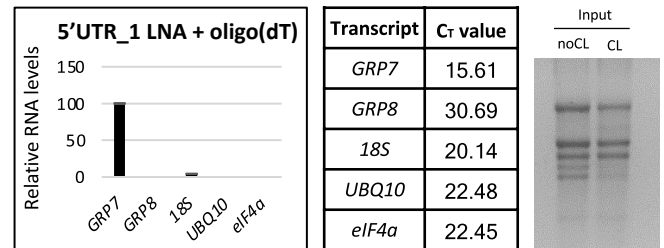

### Additional file 3: Experimental procedure and composition of the buffers used for optimization of the specific RNP capture.

(A, B) Buffer composition and protocol based on Rogell *et al.* (2017) for specific capture of rRNA binding proteins (A) and Chu *et al.* (2015) for ChIRP-MS (B). (C, D) Analysis of RNA levels in eluates determined by RT-qPCR (left), corresponding C<sub>T</sub> values (middle), and agarose-formaldehyde gel electrophoresis of total RNA in the input of crosslinked and non-crosslinked samples (right) after tandem capture with the LNA 5'UTR<sub>1</sub> probe followed by oligo(dT) capture using the protocol of Rogell *et al.*, 2017 (C) or Chu *et al.*, 2015 (D).
