# Supplementary material for: Revealing the Arabidopsis AtGRP7 mRNA binding proteome by specific enhanced RNA interactome capture
Source: PubMed Central journal article supplement (PMC11177498; doi:10.1186/s12870-024-05249-4), 2024-06-14
Supplement: 12870_2024_5249_MOESM6_ESM.pdf [file 12870_2024_5249_MOESM6_ESM.pdf]

## Additional file 6

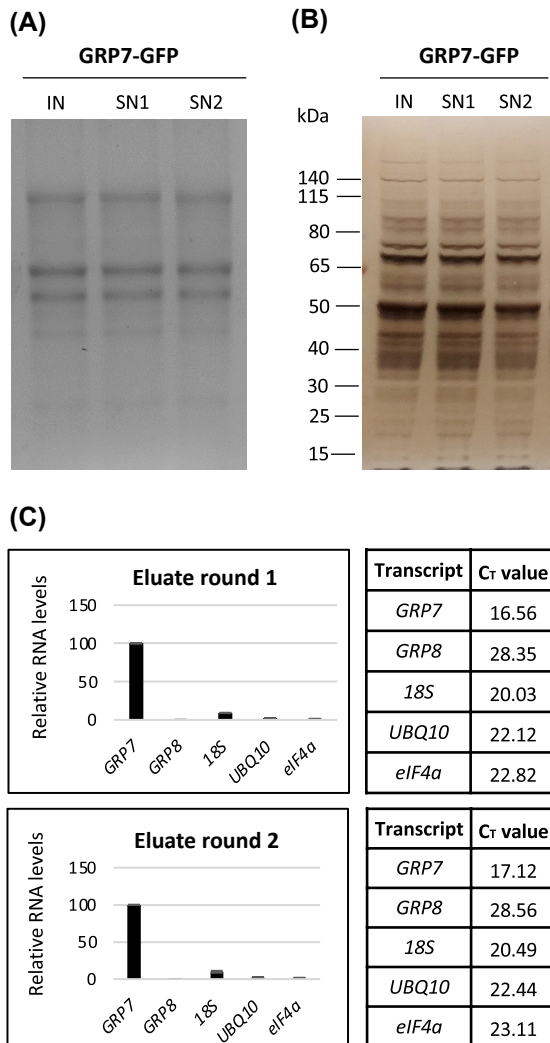

### Additional file 6: Protein and RNA analysis upon two rounds of capture with 5'UTR\_1 LNA oligo.

**(A)** Agarose-formaldehyde gel electrophoresis of total RNA in the lysate (input) and the supernatant after the first round (SN1) and second round (SN2) of probe hybridization in the *AtGRP7*-GFP *grp7-1* plants. **(B)** Silver staining of total protein in the lysate (input) and the supernatant after the first round (SN1) and second round (SN2) of probe hybridization in the *AtGRP7*-GFP *grp7-1* plants. The positions of the molecular weight markers are indicated. **(C)** Relative *AtGRP7*, *AtGRP8*, 18S rRNA, *UBIQUITIN10*, and *eIF4a* RNA levels in the eluates of the first round (top) and the second round (bottom). Right, corresponding CT values.
