# Supplementary material for: Revealing the Arabidopsis AtGRP7 mRNA binding proteome by specific enhanced RNA interactome capture
Source: PubMed Central journal article supplement (PMC11177498; doi:10.1186/s12870-024-05249-4), 2024-06-14
Supplement: 12870_2024_5249_MOESM7_ESM.pdf [file 12870_2024_5249_MOESM7_ESM.pdf]

## Additional file 7

**(A)** Large-scale tandem RNP capture  
5'UTR\_1 LNA + LNA2.T (100 g)

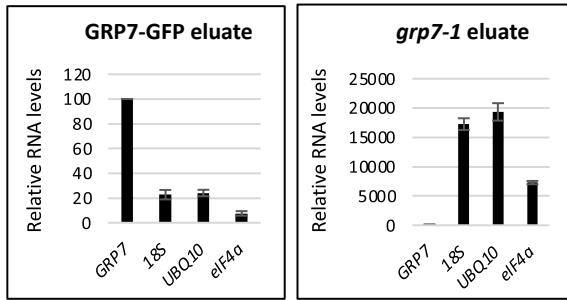

**(B)** Large-scale single RNP capture  
5'UTR\_1 LNA (100 g)

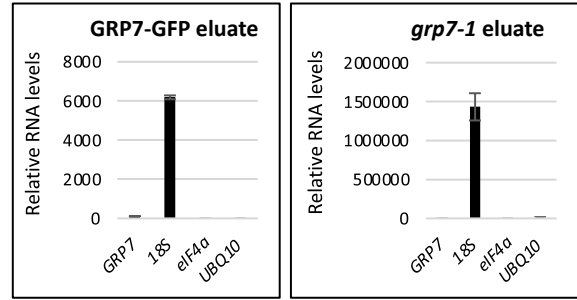

### Additional file 7: RNA levels in the eluates after large-scale captures.

Relative *AtGRP7*, 18S rRNA, *UBIQUITIN 10*, and *eIF4a* RNA levels in the eluates of *AtGRP7*-GFP *grp7-1* plants (left) and *grp7-1* control plants (right) upon large scale tandem capture with two consecutive rounds of hybridization with the 5'UTR\_1 LNA oligonucleotide followed by LNA2.T capture (**A**), or large-scale single capture with two consecutive rounds of hybridization with the 5'UTR\_1 LNA oligo only (**B**).
