# Supplementary material for: Revealing the Arabidopsis AtGRP7 mRNA binding proteome by specific enhanced RNA interactome capture
Source: PubMed Central journal article supplement (PMC11177498; doi:10.1186/s12870-024-05249-4), 2024-06-14
Supplement: 12870_2024_5249_MOESM8_ESM.pdf [file 12870_2024_5249_MOESM8_ESM.pdf]

## Additional file 8

| AGI                               | TAIR alias   |
|-----------------------------------|--------------|
| <b>RRM domain proteins</b>        |              |
| AT1G01080                         | CP28B        |
| AT1G03457                         | BRN2         |
| AT2G21660                         | GRP7         |
| AT2G32080                         | PUR-ALPHA-1  |
| AT5G54900                         | RBP45A       |
| AT4G27000                         | RBP45C       |
| AT5G02530                         | ALY2         |
| AT3G52380                         | CP33A        |
| AT2G35410                         | CP33B        |
| AT4G09040                         | CP33C        |
| <b>Ribosomal proteins</b>         |              |
| AT1G35680                         | RPL21C       |
| AT2G36160                         | US11Z        |
| AT3G04920                         | ES24Z        |
| AT5G15200                         | US4Z         |
| AT5G16130                         | ES7X         |
| <b>Translation factors</b>        |              |
| AT3G11400                         | EIF3G1       |
| AT3G13920                         | EIF4A1 (RH4) |
| <b>ALBA proteins</b>              |              |
| AT1G20220                         | ALBA2        |
| AT1G76010                         | ALBA4        |
| <b>Nuclear Transport proteins</b> |              |
| AT3G25150                         | ATG3BP-3     |
| AT5G60980                         | ATG3BP-1     |
| <b>Others</b>                     |              |
| AT1G48920                         | NUC1         |
| AT5G26742                         | RH3          |
| AT5G63260                         | ATC3H67      |
| AT4G29060                         | EMB2726      |
| AT4G16390                         | SVR7         |
| AT5G04430                         | ATKH22       |
| AT4G28440                         |              |
| AT3G23700                         | SRRP1        |
| ATCG00490                         | RBCL         |

**Additional file 8: List of 30 common proteins** from the large-scale single capture with two consecutive rounds of hybridization with the 5'UTR\_1 LNA oligonucleotide and the large-scale tandem capture with hybridization with 5'UTR\_1 LNA oligonucleotide followed by LNA2.T capture.
