# Supplementary material for: Revealing the Arabidopsis AtGRP7 mRNA binding proteome by specific enhanced RNA interactome capture
Source: PubMed Central journal article supplement (PMC11177498; doi:10.1186/s12870-024-05249-4), 2024-06-14
Supplement: 12870_2024_5249_MOESM9_ESM.pdf [file 12870_2024_5249_MOESM9_ESM.pdf]

## Additional file 9

(A)

*In vitro* transcript for *GRP7* 5'UTR capture

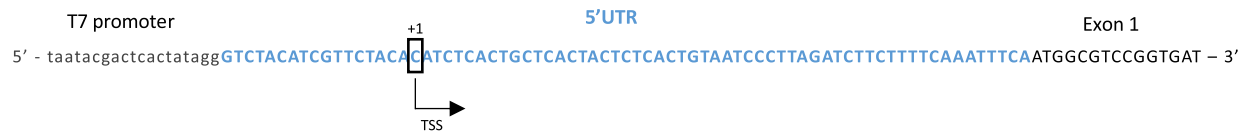

(B)

*In vitro* transcript for *GRP7* 3'UTR capture

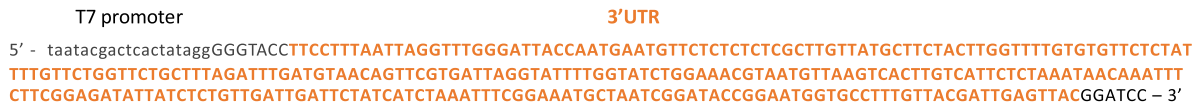

**Additional file 9: Sequences of baits** derived from the *AtGRP7* 5'UTR (A) and 3'UTR (B) used for *in vitro* pulldowns.
