# Supplementary material for: Revealing the Arabidopsis AtGRP7 mRNA binding proteome by specific enhanced RNA interactome capture
Source: PubMed Central journal article supplement (PMC11177498; doi:10.1186/s12870-024-05249-4), 2024-06-14
Supplement: 12870_2024_5249_MOESM10_ESM.pdf [file 12870_2024_5249_MOESM10_ESM.pdf]

## Additional file 10

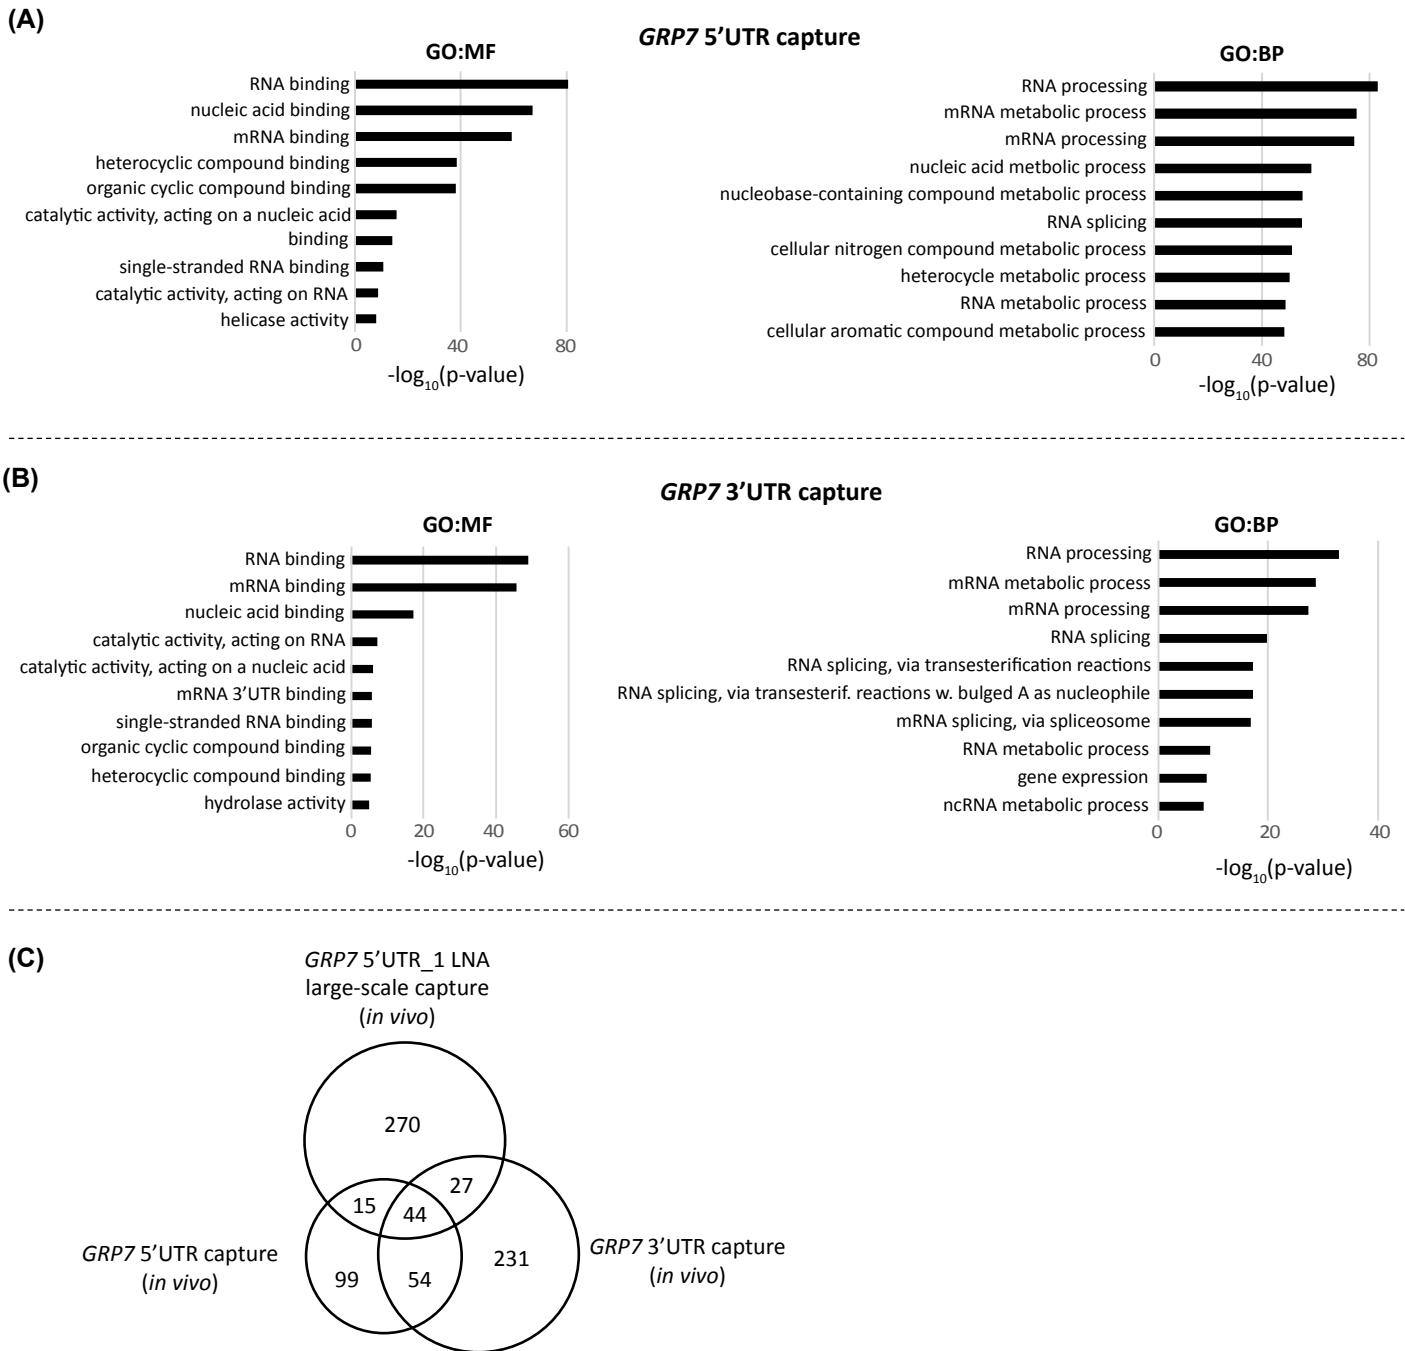

### Additional file 10: GO term analysis of proteins identified by *in vitro* captures

Enriched GO terms for molecular function and biological process for proteins significantly enriched after *in vitro* capture with the 5'UTR bait **(A)** and 3'UTR bait **(B)**. **(C)** Venn diagram of proteins identified by large scale *in vivo* capture with the 5'UTR\_1 LNA oligo and significantly enriched proteins from the *in vitro* pulldowns.
