# Supplementary material for: Revealing the Arabidopsis AtGRP7 mRNA binding proteome by specific enhanced RNA interactome capture
Source: PubMed Central journal article supplement (PMC11177498; doi:10.1186/s12870-024-05249-4), 2024-06-14
Supplement: 12870_2024_5249_MOESM11_ESM.pdf [file 12870_2024_5249_MOESM11_ESM.pdf]

## Additional file 11

### Translation factors

| AGI       | TAIR alias | <i>in vivo</i><br>(large-scale) |                                    | <i>in vitro</i> |       |
|-----------|------------|---------------------------------|------------------------------------|-----------------|-------|
|           |            | GRP7<br>5'UTR_1<br>LNA          | GRP7<br>5'UTR_1<br>LNA +<br>LNA2.T | 5'UTR           | 3'UTR |
| AT3G11400 | EIF3G1     | ✓                               | ✓                                  |                 |       |
| AT4G29060 | EMB2726    | ✓                               |                                    |                 | ✓     |
| AT5G20920 | EIF2 beta  |                                 |                                    | ✓               | ✓     |
| AT1G04170 | EIF2 gamma |                                 |                                    | ✓               | ✓     |
| AT2G45730 | TRM6       |                                 |                                    | ✓               | ✓     |

### TPR proteins

| AGI       | TAIR alias | <i>in vivo</i><br>(large-scale) |                                    | <i>in vitro</i> |       |
|-----------|------------|---------------------------------|------------------------------------|-----------------|-------|
|           |            | GRP7<br>5'UTR_1<br>LNA          | GRP7<br>5'UTR_1<br>LNA +<br>LNA2.T | 5'UTR           | 3'UTR |
| AT1G02150 | CCR16      | ✓                               |                                    | ✓               | ✓     |
| AT1G55890 | MS78       | ✓                               |                                    | ✓               | ✓     |
| AT3G13160 | MS79       | ✓                               |                                    | ✓               | ✓     |
| AT4G36680 | ML103      | ✓                               |                                    | ✓               | ✓     |
| AT1G17760 | CSTF77     |                                 |                                    | ✓               | ✓     |
| AT3G13150 | -          | ✓                               |                                    | ✓               | ✓     |
| AT5G28740 | -          |                                 |                                    | ✓               | ✓     |

### Poly(A)-binding proteins

| AGI       | TAIR alias | <i>in vivo</i><br>(large-scale) |                                    | <i>in vitro</i> |       |
|-----------|------------|---------------------------------|------------------------------------|-----------------|-------|
|           |            | GRP7<br>5'UTR_1<br>LNA          | GRP7<br>5'UTR_1<br>LNA +<br>LNA2.T | 5'UTR           | 3'UTR |
| AT4G34110 | PAB1       | ✓                               |                                    | ✓               | ✓     |
| AT2G23350 | PAB4       | ✓                               |                                    | ✓               |       |
| AT1G49760 | PAB8       | ✓                               |                                    | ✓               | ✓     |

### Splicing factors

| AGI       | TAIR alias | <i>in vivo</i><br>(large-scale) |                                    | <i>in vitro</i> |       |
|-----------|------------|---------------------------------|------------------------------------|-----------------|-------|
|           |            | GRP7<br>5'UTR_1<br>LNA          | GRP7<br>5'UTR_1<br>LNA +<br>LNA2.T | 5'UTR           | 3'UTR |
| AT1G23860 | RSZ21      |                                 |                                    | ✓               | ✓     |
| AT4G31580 | RSZ22      | ✓                               |                                    | ✓               | ✓     |
| AT2G24590 | RSZ22A     |                                 |                                    | ✓               | ✓     |
| AT4G25500 | RS40       |                                 |                                    | ✓               | ✓     |
| AT5G52040 | RS41       | ✓                               |                                    | ✓               | ✓     |
| AT5G06160 | ATO        | ✓                               |                                    | ✓               |       |
| AT2G47640 | SMD2A      | ✓                               |                                    | ✓               |       |
| AT5G44500 | SMBA       | ✓                               |                                    |                 | ✓     |
| AT1G03330 | LSM2       |                                 |                                    | ✓               | ✓     |
| AT1G07910 | AtRLG1     |                                 |                                    | ✓               | ✓     |
| AT2G47580 | U1A        |                                 |                                    | ✓               | ✓     |
| AT3G55460 | SCL30      |                                 |                                    | ✓               | ✓     |
| AT3G13570 | SCL30A     |                                 |                                    | ✓               | ✓     |
| AT4G36690 | ATU2AF65A  |                                 |                                    | ✓               | ✓     |
| AT3G18790 | -          | ✓                               |                                    | ✓               | ✓     |
| AT4G21660 | -          | ✓                               |                                    | ✓               | ✓     |
| AT5G64270 | -          |                                 |                                    | ✓               | ✓     |

### Small RNA-related proteins

| AGI       | TAIR alias | <i>in vivo</i><br>(large-scale) |                                    | <i>in vitro</i> |       |
|-----------|------------|---------------------------------|------------------------------------|-----------------|-------|
|           |            | GRP7<br>5'UTR_1<br>LNA          | GRP7<br>5'UTR_1<br>LNA +<br>LNA2.T | 5'UTR           | 3'UTR |
| AT1G48410 | AGO1       | ✓                               |                                    | ✓               | ✓     |
| AT1G31280 | AGO2       |                                 |                                    | ✓               | ✓     |
| AT2G27040 | AGO4       | ✓                               |                                    | ✓               |       |
| AT2G27100 | SE         |                                 |                                    | ✓               | ✓     |
| AT2G38770 | MAC7       | ✓                               |                                    | ✓               | ✓     |
| AT1G07360 | MAC5A      | ✓                               |                                    | ✓               |       |

**Additional file 11: Overview of additional groups of proteins identified by *in vivo* and *in vitro* pulldowns of *AtGRP7* interactors.**
