# Supplementary material for: Revealing the Arabidopsis AtGRP7 mRNA binding proteome by specific enhanced RNA interactome capture
Source: PubMed Central journal article supplement (PMC11177498; doi:10.1186/s12870-024-05249-4), 2024-06-14
Supplement: 12870_2024_5249_MOESM12_ESM.pdf [file 12870_2024_5249_MOESM12_ESM.pdf]

Additional file 12

(A)

| DNA probe # | Sequence (5'→3')      | Probe position | Length | % GC  |
|-------------|-----------------------|----------------|--------|-------|
| 1           | TTGGGGACATATCACGTGAC  | 24             | 20 nt  | 50.0% |
| 2           | CGATGTAGACGAAGTCTCGT  | 159            | 20 nt  | 50.0% |
| 3           | CAACGAAGCACCGATACTCA  | 259            | 20 nt  | 50.0% |
| 4           | CCAGTCTCACGATCGTTAAT  | 359            | 20 nt  | 45.0% |
| 5           | GTTAACAGTGATGCTACGGC  | 468            | 20 nt  | 50.0% |
| 6           | ACCACCTCTTGAGGAGTAAC  | 651            | 20 nt  | 50.0% |
| 7           | AAAGGAATTACCATCCTCCA  | 760            | 20 nt  | 40.0% |
| 8           | CATTACGTTTCCAGATACCA  | 908            | 20 nt  | 40.0% |
| 9           | CGGTATCCGATTAGCATTTTC | 1009           | 20 nt  | 45.0% |
| 10          | GGTTTCTACTTCATTGTTGA  | 1129           | 20 nt  | 35.0% |

(B)

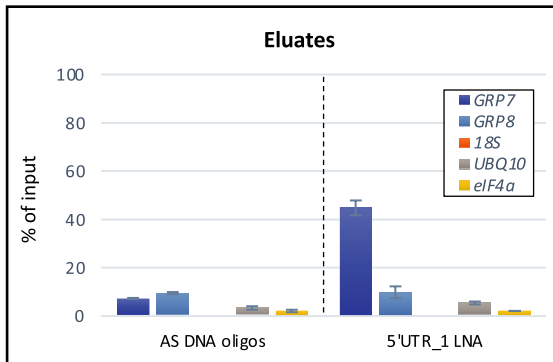

(C)

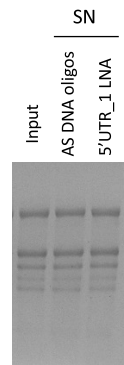

**Additional file 12: Capture with antisense DNA oligonucleotides.**

(A) Sequences of antisense (AS) DNA oligonucleotides directed against *AtGRP7*. (B) Relative *AtGRP7*, 18S rRNA, *UBIQUITIN 10*, and *eIF4a* RNA levels in the eluates of *AtGRP7*-GFP *grp7-1* plants upon capture with AS DNA oligonucleotides or with the 5'UTR\_1 LNA oligo. (C) Agarose-formaldehyde gel electrophoresis of total RNA in the lysate (input) and the supernatant (SN) after hybridization with AS DNA oligonucleotides or the 5'UTR\_1 LNA oligo in *AtGRP7*-GFP *grp7-1* plants.
